# Supplementary material for: Influences of Cluster Thinning on Fatty Acids and Green Leaf Volatiles in the Production of Cabernet Sauvignon Grapes and Wines in the Northwest of China
Source: MDPI journal article supplement (doi:10.3390/plants13091225), 2024-04-28
Supplement: s1 [file s1]

Supplementary materials for:

# Influences of Cluster Thinning on Fatty Acids and Green Leaf Volatiles in the Production of Cabernet Sauvignon Grapes and Wines in the Northwest of China

Xiaoyu Xu <sup>1,2,†</sup>, Chifang Cheng <sup>3,†</sup>, Xu Qian <sup>4</sup>, Ying Shi <sup>1,2</sup>, Changqing Duan <sup>1,2</sup>, Yibin Lan <sup>1,2,\*</sup>

<sup>1</sup> Centre for Viticulture & Enology, College of Food Science and Nutritional Engineering, China Agricultural University, Beijing 100083, China; xuxiaoyu62429@163.com (X.X.); shiy@cau.edu.cn (Y.S.); chqduan@cau.edu.cn (C.D.)

<sup>2</sup> Key Laboratory of Viticulture and Enology, Ministry of Agriculture and Rural Affairs, College of Food Science and Nutritional Engineering, China Agricultural University, Beijing 100083, China

<sup>3</sup> Xinjiang Wine Industry Innovation Research Institute, Manasi 832200, China; chengchifang@citicguoanwine.com

<sup>4</sup> School of Biology and Food Engineering, Changshu Institute of Technology, Changshu 215500, China; qianxu@cslg.edu.cn

\* Correspondence: lanyibin@cau.edu.cn; Tel.: +86-010-62-738-658

† These authors contributed equally to this work.

# Catalog

|                                                                                                                                                                                                                                                                                                                                                                                                                                            |          |
|--------------------------------------------------------------------------------------------------------------------------------------------------------------------------------------------------------------------------------------------------------------------------------------------------------------------------------------------------------------------------------------------------------------------------------------------|----------|
| <b>Supplementary figures.....</b>                                                                                                                                                                                                                                                                                                                                                                                                          | <b>1</b> |
| <b>Figure S1.</b> Effects of cluster thinning treatments on berry weight, total soluble solids (TSS) content and titratable acidity (TA) in berries of Cabernet Sauvignon during grape development in two seasons (2011-2012). CT-1, one cluster per shoot thinned, 1 cluster/shoot reserved; (B) CT-2, one cluster every other shoot thinned, average 1.5 clusters/shoot reserved; (C) CT-3, not thinned, 2 clusters/shoot reserved. .... | 1        |
| <b>Figure S2.</b> Schematic diagram of three cluster thinning treatments. (A) CT-1, one cluster per shoot thinned, 1 cluster/shoot reserved; (B) CT-2, one cluster every other shoot thinned, average 1.5 clusters/shoot reserved; (C) CT-3, not thinned, 2 clusters/shoot reserved. ....                                                                                                                                                  | 2        |
| <b>Supplementary tables .....</b>                                                                                                                                                                                                                                                                                                                                                                                                          | <b>3</b> |
| <b>Table S1.</b> Meteorological data of the experimental field during the growing season (April-October) and ripening period (August-September) in 2011-2012. ....                                                                                                                                                                                                                                                                         | 3        |
| <b>Table S2.</b> The concentrations of C <sub>6</sub> and C <sub>9</sub> volatiles in wines made from berries with different treatments from two farms in two vintages. ....                                                                                                                                                                                                                                                               | 4        |
| <b>Table S3.</b> The average values of the selected soils parameters in two vineyards. ....                                                                                                                                                                                                                                                                                                                                                | 5        |
| <b>Table S4.</b> Wine parameters made from berries with different treatments from two farms in two vintages. ....                                                                                                                                                                                                                                                                                                                          | 6        |

## Supplementary figures

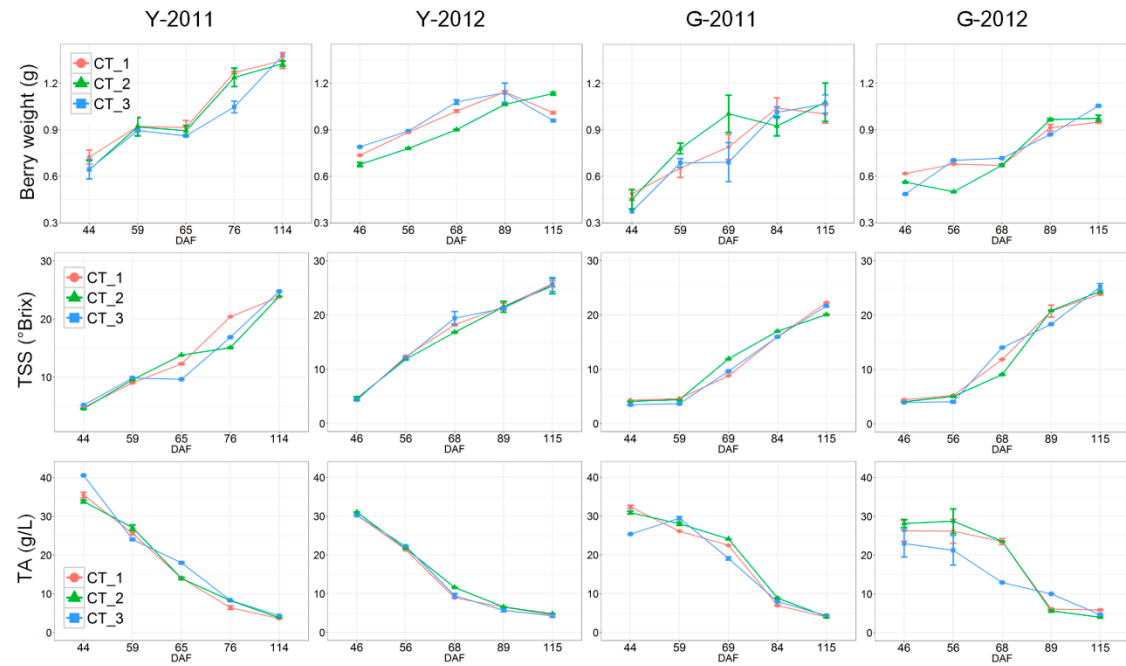

**Figure S1.** Effects of cluster thinning treatments on berry weight, total soluble solids (TSS) content and titratable acidity (TA) in berries of Cabernet Sauvignon during grape development in two seasons (2011-2012). CT-1, one cluster per shoot thinned, 1 cluster/shoot reserved; (B) CT-2, one cluster every other shoot thinned, average 1.5 clusters/shoot reserved; (C) CT-3, not thinned, 2 clusters/shoot reserved.

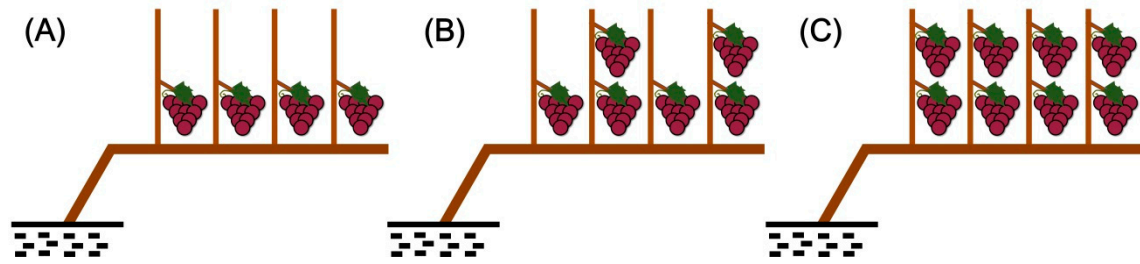

**Figure S2.** Schematic diagram of three cluster thinning treatments. (A) CT-1, one cluster per shoot thinned, 1 cluster/shoot reserved; (B) CT-2, one cluster every other shoot thinned, average 1.5 clusters/shoot reserved; (C) CT-3, not thinned, 2 clusters/shoot reserved.

### Supplementary tables

**Table S1.** Meteorological data of the experimental field during the growing season (April-October) and ripening period (August-September) in 2011-2012.

| Year | Mean             |         | Growing Degree |         | Sunlight Duration |         | Rain (mm) |         |
|------|------------------|---------|----------------|---------|-------------------|---------|-----------|---------|
|      | Temperature (°C) |         | Days (°C)      |         | (h)               |         |           |         |
|      | Aug-Sep          | Apr-Oct | Aug-Sep        | Apr-Oct | Aug-Sep           | Apr-Oct | Aug-Sep   | Apr-Oct |
| 2011 | 22.1             | 20.3    | 740.9          | 2290.6  | 627.4             | 2173.7  | 41.2      | 181.1   |
| 2012 | 22.3             | 20.8    | 752.9          | 2356.2  | 647.3             | 2235.8  | 29.0      | 103.6   |

**Table S2.** The concentrations of C<sub>6</sub> and C<sub>9</sub> volatiles in wines made from berries with different treatments from two farms in two vintages.

| Wine volatiles (µg/L)  | Y-farm      |             |             |             |               |              | G-farm      |             |             |              |               |              |
|------------------------|-------------|-------------|-------------|-------------|---------------|--------------|-------------|-------------|-------------|--------------|---------------|--------------|
|                        | 2011        |             |             | 2012        |               |              | 2011        |             |             | 2012         |               |              |
|                        | CT-1        | CT-2        | CT-3        | CT-1        | CT-2          | CT-3         | CT-1        | CT-2        | CT-3        | CT-1         | CT-2          | CT-3         |
| Ethyl hexanoate (mg/L) | 0.84±0.30a* | 0.63±0.19a  | 0.59±0.20a  | 3.72±0.10a  | 4.58±0.15b    | 3.93±0.24ab  | 0.54±0.07a  | 0.75±0.03a  | 0.87±0.16a  | 4.42±0.47a   | 3.87±0.29a    | 4.54±0.11a   |
| Hexyl acetate          | 16.05±6.45a | 9.03±4.4a   | 7.72±1.18a  | 98.97±2.7b  | 21.43±0.56a   | 164.59±8.55c | 23.67±7.44a | 35.36±1.48a | 44.25±8.03a | 314.8±32.19a | 316.98±24.05a | 324.45±7.32a |
| Ethyl 3-hexenoate      | nd**        | nd          | nd          | 2.23±1.65a  | 5.91±0.27a    | 2.3±2.05a    | nd          | nd          | nd          | 6.11±0.54a   | 6.17±0.12a    | 6.66±0.04a   |
| Propyl hexanoate       | nd          | nd          | nd          | 8.58±0.21a  | 12.47±0.5b    | 9.1±0.24a    | nd          | nd          | nd          | 11.79±1.47a  | 10.44±1.3a    | 14.59±0.53a  |
| Ethyl 2-hexenoate      | 12.16±3.08a | 6.38±1.83a  | 8.11±1.24a  | 15.52±0.24c | 11.36±0.23a   | 12.61±0.16b  | 6.72±0.72a  | 6.56±0.25a  | 9.87±0.6b   | 15.35±1.13a  | 14.96±0.51a   | 17.13±0.51a  |
| 1-Hexanol (mg/L)       | 1.86±0.05a  | 1.38±0.17a  | 1.72±0.27a  | 0.36±0.02b  | 0.27±0.02a    | 0.31±0.01ab  | 1.56±0.01a  | 2.22±0.07b  | 2.41±0.09b  | 0.45±0.01a   | 0.46±0.01a    | 0.48±0.01a   |
| (E)-3-Hexen-1-ol       | 23.36±1.21a | 16.83±1.37a | 23.49±4.42a | 95.79±0.58c | 71.74±0.65a   | 84.01±1.81b  | 22.02±1.41a | 30.08±0.6b  | 35.89±0.1c  | 128.78±5.98a | 137.71±4.36a  | 124.29±6.3a  |
| (Z)-3-Hexen-1-ol       | 7.25±0.56a  | 7.51±0.15a  | 6.37±0.24a  | 94.17±7.56a | 120.97±5.73ab | 138.59±6.17b | 9.05±0.38a  | 12.1±0.35b  | 11.46±0.78b | 267.49±8.25a | 278.41±5.67a  | 367.08±7.93b |
| (E)-2-Hexen-1-ol       | 6.77±9.57a  | nda         | nda         | nd          | nd            | nd           | nd          | nd          | nd          | nd           | nd            | nd           |
| Ethyl 8-nonenoate      | 1.14±1.62a  | 1.24±1.75a  | 2.57±0.12a  | 3.34±0.54a  | 3.57±0.01a    | 3.5±0.01a    | 1.52±2.14a  | 1.55±2.19a  | 2.53±1.36a  | 3.47±0.01a   | 3.47±0a       | 3.44±0.03a   |
| (Z)-3-Nonen-1-ol       | nd          | nd          | nd          | 0.36±0.1a   | 0.29±0a       | 0.29±0a      | nd          | nd          | nd          | 0.29±0a      | 0.68±0.16b    | 0.29±0a      |
| (E)-6-Nonen-1-ol       | 1.02±0.03a  | 0.98±0.28a  | 1.06±0.01a  | 1.38±0.02b  | 1.08±0.1a     | 1.31±0.04ab  | nd          | nd          | nd          | 1.5±0.06a    | 1.34±0.13a    | 1.55±0.15a   |
| (E,Z)-2,6-Nonadienal   | nd          | nd          | nd          | 3.11±0.23b  | 3.67±0.05b    | 2.09±0.16a   | nd          | nd          | nd          | 3.35±0.47a   | 3.04±0.07a    | 2.97±0.02a   |
| Hexanoic acid (mg/L)   | 0.58±0.21a  | 0.40±0.08a  | 0.37±0.11a  | nd          | nd            | nd           | 0.47±0.13a  | 0.56±0.12a  | 0.47±0.05a  | nd           | nd            | nd           |
| Esters (mg/L)          | 0.86±0.31a  | 0.65±0.20a  | 0.61±0.02a  | 3.85±0.10a  | 4.63±0.15b    | 4.12±0.24ab  | 0.58±0.08a  | 0.79±0.03a  | 0.93±0.02a  | 4.77±0.51a   | 4.22±0.32a    | 4.90±0.12a   |
| Alcohols (mg/L)        | 1.90±0.06a  | 1.40±0.17a  | 1.75±0.28a  | 0.56±0.01b  | 0.47±0.02a    | 0.54±0.00b   | 1.59±0.00a  | 2.26±0.07b  | 2.46±0.09b  | 0.85±0.03a   | 0.87±0.01ab   | 0.97±0.03b   |
| C <sub>9</sub>         | 2.16±1.59a  | 2.22±2.04a  | 3.63±0.13a  | 8.19±0.68a  | 8.61±0.04a    | 7.19±0.21a   | 1.52±2.14a  | 1.55±2.19a  | 2.53±1.36a  | 8.62±0.55a   | 8.53±0.21a    | 8.26±0.16a   |
| C <sub>6</sub> (mg/L)  | 3.34±0.58a  | 2.45±0.10a  | 2.73±0.36a  | 4.40±0.11a  | 5.10±0.17a    | 4.65±0.25a   | 2.63±0.22a  | 3.62±0.23b  | 3.86±0.21b  | 5.62±0.53a   | 5.09±0.31a    | 5.87±0.15a   |
| Sum*** (mg/L)          | 3.35±0.58a  | 2.45±0.11a  | 2.73±0.37a  | 4.41±0.11a  | 5.11±0.17a    | 4.66±0.25a   | 2.63±0.22a  | 3.62±0.23b  | 3.86±0.21b  | 5.63±0.54a   | 5.10±0.31a    | 5.88±0.15a   |

\*Different letters represent significant differences among treatments from individual farm in each vintage according to Duncan test ( $P < 0.05$ ).\*\*nd means not detected. \*\*\*Sum represents the total concentration of all C<sub>6</sub> and C<sub>9</sub> volatiles.

**Table S3.** The average values of the selected soils parameters in two vineyards.

| Vineyards | Sand<br>(%) | pH  | Organic<br>Matter (%) | Water<br>Content (%) | Elements (mg/kg) |        |       |      |      |       |
|-----------|-------------|-----|-----------------------|----------------------|------------------|--------|-------|------|------|-------|
|           |             |     |                       |                      | Na               | Ca     | Mg    | N    | P    | K     |
| Y-farm    | 35.2        | 7.9 | 0.8                   | 25.1                 | 33.0             | 3711.4 | 231.1 | 59.1 | 4.7  | 133.2 |
| G-farm    | 29.9        | 7.3 | 6.1                   | 36.5                 | 58.3             | 3798.0 | 367.0 | 79.9 | 23.4 | 104.9 |

**Table S4.** Wine parameters made from berries with different treatments from two farms in two vintages.

| Treatment     | Ethanol (%vol) |                    | Residual sugar (g/L) |                   | pH                |                   |
|---------------|----------------|--------------------|----------------------|-------------------|-------------------|-------------------|
| <b>Y-farm</b> | 2011           | 2012               | 2011                 | 2012              | 2011              | 2012              |
| CT-1          | 13.70          | 15.20 <sup>b</sup> | 2.90                 | 2.68 <sup>a</sup> | 3.99              | 3.88 <sup>a</sup> |
| CT-2          | 13.70          | 14.00 <sup>a</sup> | 2.88                 | 3.33 <sup>b</sup> | 3.98              | 3.94 <sup>b</sup> |
| CT-3          | 14.00          | 15.10 <sup>b</sup> | 2.55                 | 2.70 <sup>a</sup> | 3.94              | 3.87 <sup>a</sup> |
| Significance  | ns             | *                  | ns                   | *                 | ns                | *                 |
| <b>G-farm</b> | 2011           | 2012               | 2011                 | 2012              | 2011              | 2012              |
| CT-1          | 13.10          | 13.30              | 3.30                 | 3.61              | 4.00 <sup>b</sup> | 3.76 <sup>b</sup> |
| CT-2          | 12.30          | 13.70              | 3.11                 | 3.90              | 3.93 <sup>a</sup> | 3.76 <sup>b</sup> |
| CT-3          | 12.70          | 13.20              | 3.23                 | 3.80              | 3.93 <sup>a</sup> | 3.75 <sup>a</sup> |
| Significance  | ns             | ns                 | ns                   | ns                | *                 | *                 |

Different letters represent significant differences among treatments in each vintage according to Duncan test. \*: significant at 0.05 level. Cluster thinning treatments: CT-1, one cluster per shoot thinned, 1 cluster/shoot reserved; CT-2, one cluster every other shoot thinned, average 1.5 clusters/shoot reserved; CT-3, not thinned, 2 clusters/shoot reserve.
